# Supplementary material for: High-resolution numerical modelling of seasonal volume, freshwater, and heat transport along the Indian coast
Source: Copernicus journal article supplement (doi:10.5194/egusphere-2023-3011), 2024-01-02
Supplement: Supplementary file 1 [file egusphere-2023-3011-supplement.pdf]

Supplementary information for  
**High-resolution numerical modelling of seasonal volume, freshwater, and heat transport  
along the Indian coast**

*Kunal Madkaiker<sup>[1]</sup>\*, Ambarukhana D. Rao<sup>[1]</sup>, Sudheer Joseph<sup>[2]</sup>*

*<sup>[1]</sup> Indian Institute of Technology Delhi, Hauz Khas, New Delhi, India*

*<sup>[2]</sup> Indian National Centre for Ocean Information Services (INCOIS), Ministry of Earth Sciences,  
Hyderabad, India*

**Contents of this file**

Text S1 to S2

Figures S1 to S3

Tables S1 to S3

**Text S1:** Validation of ocean temperature

The statistical validation of model ocean temperature has been done with RAMA and gridded ARGO datasets and correlation, bias and RMSD have been evaluated over monthly climatology. We have considered 3 locations each in the AS and BoB. The model shows a high positive correlation with both observations over the top 50 meters at all locations. It seems to perform quite well in the southern AS and BoB (4°N latitude). We observe that the model correlates well with ARGO than RAMA data. In the AS, RAMA buoy data is available for a shorter span (3-4 years) as compared to BoB. Thus, the climatology may not capture the long-term mean signal within this span. We observe the bias does not exceed  $\pm 1^\circ\text{C}$  except over two locations in the AS. Similarly, the RMSD value is very low (two orders less) which is to be expected. This shows that the model is able to capture the mixing processes and net heat flux well to simulate ocean temperature.

**Text S2:** Validation of ocean salinity

The statistical validation (till 100 meters) of model ocean salinity has been done with RAMA and gridded ARGO datasets and correlation, bias and RMSD have been evaluated over monthly climatology. Comparison has been done at the same locations as that with temperature. Model salinity too performs very well at 4°N latitude with high positive correlation, and almost zero bias and RMSD. The model shows a high positive correlation with both observations over the top 50 meters. Overall, the bias and RMSD do not exceed  $\pm 0.5$  psu. This shows that the model is able to capture the effects of evaporation, precipitation, and river runoff well to simulate ocean salinity.

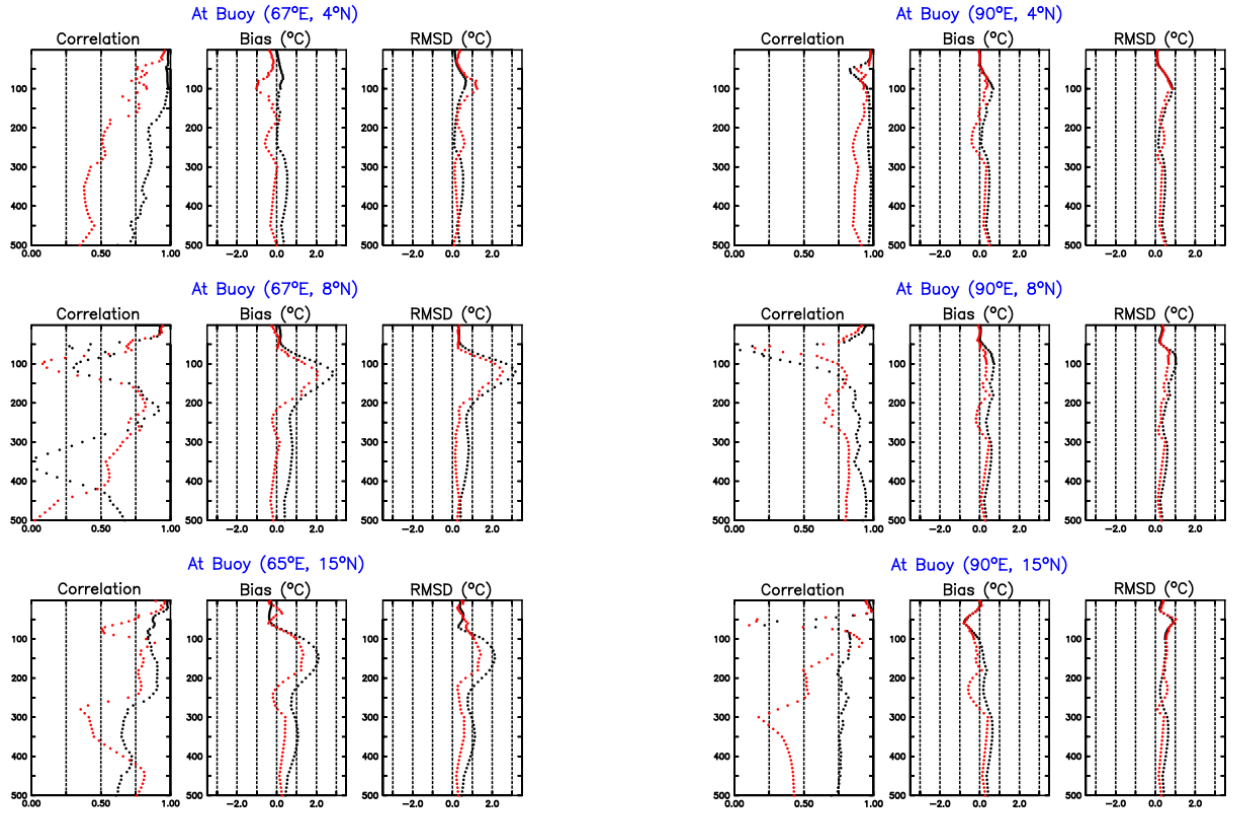

**Figure S1:** Statistical validation (till 500 meters) of ocean temperature (in °C) with gridded ARGO (black dots) and RAMA buoy (red dots) locations in the Arabian Sea and the Bay of Bengal.

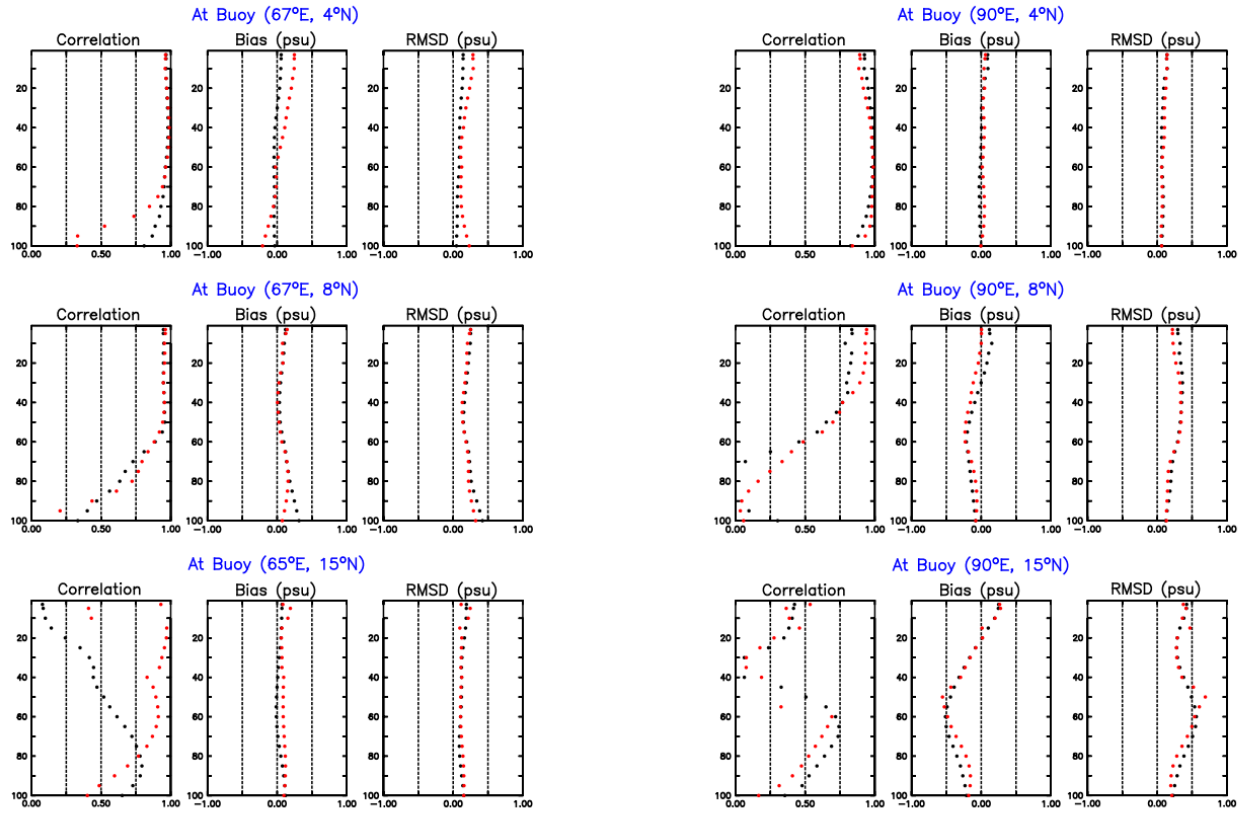

**Figure S2:** Statistical validation of ocean salinity (in psu) with gridded ARGO (black dots) and RAMA buoy (red dots) locations in the Arabian Sea and the Bay of Bengal.

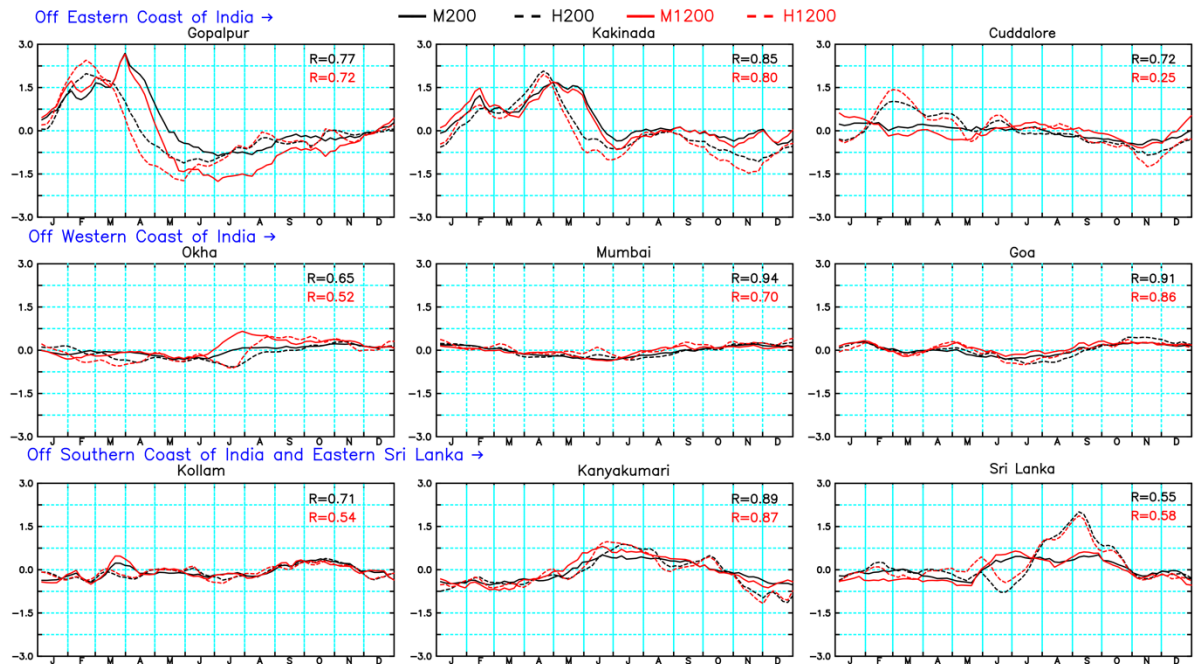

**Figure S3:** AHT (in PW) of the model (solid lines: M200 / M1200) and INC-HYC (dashed lines: H200 / H1200). R represents the Pearson's correlation coefficient between the model and INC-HYC. Articles in black colour indicate transport integrated over 200 m depth and red colour

indicates transport integrated over 1200 m depth.

**Table S1:** Model and INC-HYC AVT (in Sv, monthly climatology).

\*Gopa = Gopalpur, Kaki = Kakinada, Cudd = Cuddalore, KK = Kanyakumari, ESRL = Eastern Sri Lanka

| <b>Gopa*</b>  | <b>Jan</b> | <b>Feb</b> | <b>Mar</b> | <b>Apr</b> | <b>May</b> | <b>Jun</b> | <b>Jul</b> | <b>Aug</b> | <b>Sep</b> | <b>Oct</b> | <b>Nov</b> | <b>Dec</b> |
|---------------|------------|------------|------------|------------|------------|------------|------------|------------|------------|------------|------------|------------|
| <b>M200</b>   | 7.91       | 13.01      | 19.27      | 16.64      | -0.66      | -7.08      | -8.82      | -7.60      | -2.28      | -2.40      | -2.34      | 0.93       |
| <b>H200</b>   | 4.95       | 20.17      | 17.60      | 0.76       | -9.98      | -11.17     | -7.39      | -3.61      | -3.83      | -2.33      | -0.74      | -0.72      |
| <b>M1200</b>  | 11.64      | 19.33      | 18.70      | 3.65       | -24.04     | -27.29     | -29        | -24.37     | -14.89     | -13.73     | -7.33      | 2.53       |
| <b>H1200</b>  | 12.59      | 32.22      | 14.84      | -20.43     | -27.44     | -15.96     | -7.30      | -0.50      | -1.69      | -2.10      | -6.15      | 0.75       |
| <b>Kaki*</b>  | <b>Jan</b> | <b>Feb</b> | <b>Mar</b> | <b>Apr</b> | <b>May</b> | <b>Jun</b> | <b>Jul</b> | <b>Aug</b> | <b>Sep</b> | <b>Oct</b> | <b>Nov</b> | <b>Dec</b> |
| <b>M200</b>   | 2.58       | 9.62       | 7.33       | 14.02      | 14.88      | 2.65       | -2.01      | 0.19       | 0.06       | -1.82      | -1.58      | -2.98      |
| <b>H200</b>   | -2.20      | 6.90       | 7.86       | 17.16      | 6.12       | -5.23      | -5.39      | -0.85      | -2.48      | -6.29      | -10        | -8.01      |
| <b>M1200</b>  | 9.34       | 15.49      | 4.77       | 10.23      | 10.35      | -2.98      | -7.88      | -3.11      | -0.09      | -3.90      | -5.72      | 0.57       |
| <b>H1200</b>  | 3.52       | 10         | 1.71       | 11.33      | -2.08      | -16.05     | -8.06      | 0.65       | -4.75      | -15.09     | -21.53     | -7.90      |
| <b>Cudd*</b>  | <b>Jan</b> | <b>Feb</b> | <b>Mar</b> | <b>Apr</b> | <b>May</b> | <b>Jun</b> | <b>Jul</b> | <b>Aug</b> | <b>Sep</b> | <b>Oct</b> | <b>Nov</b> | <b>Dec</b> |
| <b>M200</b>   | 3.50       | 2.22       | 1.32       | 1.35       | 0.42       | 0.56       | 0.81       | -1.18      | -2.24      | -3.34      | -3.90      | -1.50      |
| <b>H200</b>   | -2.03      | 6.96       | 10.07      | 5.44       | 1.39       | 2.35       | -1.04      | -0.88      | -3.04      | -3.89      | -8.14      | -5.1       |
| <b>M1200</b>  | 7.98       | -0.94      | -5.58      | -6.88      | -7.78      | 0.37       | 4.92       | 5.11       | 4.49       | -0.66      | -6.54      | 4.85       |
| <b>H1200</b>  | -2.82      | 12.04      | 16.20      | 1.56       | -5.34      | 7.67       | 4.05       | 6.84       | -1.52      | -6.15      | -15.93     | -6.06      |
| <b>Okha</b>   | <b>Jan</b> | <b>Feb</b> | <b>Mar</b> | <b>Apr</b> | <b>May</b> | <b>Jun</b> | <b>Jul</b> | <b>Aug</b> | <b>Sep</b> | <b>Oct</b> | <b>Nov</b> | <b>Dec</b> |
| <b>M200</b>   | -1.02      | -0.92      | -0.83      | -1.37      | -2.74      | -2.67      | -0.15      | 1.10       | 1.06       | 1.61       | 2.04       | 1.08       |
| <b>H200</b>   | 1.17       | -0.58      | -2.23      | -4.03      | -3.25      | -3.46      | -5.38      | -1.21      | -0.04      | 1.91       | 2.60       | 1.16       |
| <b>M1200</b>  | -2.23      | -3.94      | -1.97      | 0.38       | -1.21      | -0.32      | 9.20       | 9.75       | 5.02       | 4.63       | 4.10       | 1.20       |
| <b>H1200</b>  | 0.20       | -7.01      | -6.93      | -3.77      | -1.38      | -0.80      | -4.53      | 8.85       | 9.88       | 7.01       | 1.95       | 0.95       |
| <b>Mumbai</b> | <b>Jan</b> | <b>Feb</b> | <b>Mar</b> | <b>Apr</b> | <b>May</b> | <b>Jun</b> | <b>Jul</b> | <b>Aug</b> | <b>Sep</b> | <b>Oct</b> | <b>Nov</b> | <b>Dec</b> |
| <b>M200</b>   | 1.74       | 1.05       | -0.36      | -1.77      | -2.49      | -3.03      | -2.34      | -1.16      | -0.06      | 0.95       | 1.81       | 1.36       |
| <b>H200</b>   | 2.19       | 0.89       | -0.19      | -2.66      | -1.98      | -1.82      | -2.89      | -2.01      | 0.01       | 0.74       | 2.42       | 2.25       |
| <b>M1200</b>  | -0.41      | -0.98      | -1.06      | 0.57       | -0.80      | -3.61      | -0.56      | 2.37       | 2.13       | 0.63       | 0.33       | 0.05       |

|              |      |      |      |      |      |      |       |      |      |      |      |      |
|--------------|------|------|------|------|------|------|-------|------|------|------|------|------|
| <b>H1200</b> | 2.48 | 0.09 | 3.00 | 0.53 | 0.98 | 2.13 | -1.29 | 2.61 | 4.96 | 2.73 | 2.65 | 2.83 |
|--------------|------|------|------|------|------|------|-------|------|------|------|------|------|

| <b>Goa</b>    | <b>Jan</b> | <b>Feb</b> | <b>Mar</b> | <b>Apr</b> | <b>May</b> | <b>Jun</b> | <b>Jul</b> | <b>Aug</b> | <b>Sep</b> | <b>Oct</b> | <b>Nov</b> | <b>Dec</b> |
|---------------|------------|------------|------------|------------|------------|------------|------------|------------|------------|------------|------------|------------|
| <b>M200</b>   | 2.00       | 1.03       | -0.58      | -0.23      | -1.19      | -2.20      | -2         | -1.31      | 0.99       | 2.05       | 2.30       | 1.30       |
| <b>H200</b>   | 1.43       | 0.77       | -0.91      | -0.11      | -0.18      | -1.67      | -3.80      | -3.26      | 0.08       | 3.04       | 4.34       | 2.75       |
| <b>M1200</b>  | 3.10       | 1.88       | -1.56      | 3.51       | 5.00       | 1.21       | 1.59       | 1.39       | 4.28       | 3.37       | 2.62       | 2.66       |
| <b>H1200</b>  | -1.24      | 2.23       | -2.16      | 2.53       | 3.41       | -3.31      | -3.84      | 1.30       | 1.92       | 1.78       | -0.002     | 0.76       |
| <b>Kollam</b> | <b>Jan</b> | <b>Feb</b> | <b>Mar</b> | <b>Apr</b> | <b>May</b> | <b>Jun</b> | <b>Jul</b> | <b>Aug</b> | <b>Sep</b> | <b>Oct</b> | <b>Nov</b> | <b>Dec</b> |
| <b>M200</b>   | -3.23      | -2.50      | -0.26      | -0.56      | -0.53      | -1.31      | -0.98      | -1.37      | 2.10       | 3.30       | 1.18       | -1.65      |
| <b>H200</b>   | -2.11      | -3.46      | -1.44      | -1.84      | 0.34       | 0.19       | -2.47      | -1.10      | 2.21       | 3.36       | 1.34       | -3.29      |
| <b>M1200</b>  | -4.76      | -2.87      | 2.90       | -0.82      | 1.43       | -3.06      | -1.54      | -1.72      | 3.26       | 1.30       | -0.87      | -0.83      |
| <b>H1200</b>  | -2.35      | -2.33      | 1.02       | -0.81      | -0.45      | -1.93      | -3.37      | 2.19       | 0.60       | 1.48       | 0.55       | -2.55      |
| <b>KK*</b>    | <b>Jan</b> | <b>Feb</b> | <b>Mar</b> | <b>Apr</b> | <b>May</b> | <b>Jun</b> | <b>Jul</b> | <b>Aug</b> | <b>Sep</b> | <b>Oct</b> | <b>Nov</b> | <b>Dec</b> |
| <b>M200</b>   | -4.35      | -4.30      | -4.09      | -3.66      | -0.84      | 3.65       | 3.88       | 3.41       | 2.19       | -0.16      | -1.57      | -4.18      |
| <b>H200</b>   | -5.49      | -3.14      | -4.37      | -3.50      | -2.36      | 3.65       | 7.99       | 3.97       | 1.57       | 2.15       | -5.45      | -8.91      |
| <b>M1200</b>  | -5.62      | -7.65      | -8.90      | -1.53      | 4.40       | 9.78       | 8.03       | 4.91       | 2.06       | -1.89      | -5.89      | -5.27      |
| <b>H1200</b>  | -3.10      | -5.47      | -6.12      | -3.05      | -1.02      | 12.55      | 7.36       | -1.93      | -1.79      | -0.68      | -8.88      | -8.83      |
| <b>ESRL*</b>  | <b>Jan</b> | <b>Feb</b> | <b>Mar</b> | <b>Apr</b> | <b>May</b> | <b>Jun</b> | <b>Jul</b> | <b>Aug</b> | <b>Sep</b> | <b>Oct</b> | <b>Nov</b> | <b>Dec</b> |
| <b>M200</b>   | -1.63      | -1.10      | -1.02      | -3.54      | -3.71      | 3.18       | 5.00       | 3.66       | 5.04       | 2.34       | -1.23      | -1.37      |
| <b>H200</b>   | -2.05      | 2.06       | -1.06      | -0.48      | -2.07      | -5.28      | 2.01       | 13.96      | 16.18      | 6.27       | -1.91      | -0.56      |
| <b>M1200</b>  | -7.39      | -10.10     | -9.72      | -5.94      | -5.00      | 6.7        | 5.11       | 0.48       | 5.75       | -1.69      | -4.38      | -6.63      |
| <b>H1200</b>  | -2.58      | -2.95      | -7.21      | -0.06      | 8.20       | 8.54       | 5.63       | 9.92       | 9.86       | 3.16       | -2.79      | -4.78      |

**Table S2:** Model and INC-HYC AFT (in Sv, monthly climatology).

\*Gopa = Gopalpur, Kaki = Kakinada, Cudd = Cuddalore, KK = Kanyakumari, ESRL = Eastern Sri Lanka

| <b>Gopa*</b> | <b>Jan</b> | <b>Feb</b> | <b>Mar</b> | <b>Apr</b> | <b>May</b> | <b>Jun</b> | <b>Jul</b> | <b>Aug</b> | <b>Sep</b> | <b>Oct</b> | <b>Nov</b> | <b>Dec</b> |
|--------------|------------|------------|------------|------------|------------|------------|------------|------------|------------|------------|------------|------------|
| <b>M200</b>  | 0.238      | 0.371      | 0.386      | 0.241      | 0.016      | -          | -          | -          | -          | -          | -          | -0.074     |
|              |            |            |            |            |            | 0.102      | 0.162      | 0.199      | 0.131      | 0.222      | 0.200      |            |
| <b>H200</b>  | 0.182      | 0.675      | 0.574      | 0.159      | -          | -          | -          | -          | -          | -          | -          | -0.018     |
|              |            |            |            |            | 0.129      | 0.318      | 0.303      | 0.243      | 0.314      | 0.241      | 0.066      |            |
| <b>M1200</b> | 0.221      | 0.340      | 0.379      | 0.290      | 0.118      | -          | -          | -          | -          | -          | -          | -0.075     |
|              |            |            |            |            |            | 0.006      | 0.067      | 0.122      | 0.076      | 0.168      | 0.170      |            |
| <b>H1200</b> | 0.15       | 0.616      | 0.578      | 0.252      | -          | -          | -          | -          | -          | -          | -          | -0.020     |
|              |            |            |            |            | 0.044      | 0.288      | 0.299      | 0.256      | 0.324      | 0.244      | 0.041      |            |
| <b>Kaki*</b> | <b>Jan</b> | <b>Feb</b> | <b>Mar</b> | <b>Apr</b> | <b>May</b> | <b>Jun</b> | <b>Jul</b> | <b>Aug</b> | <b>Sep</b> | <b>Oct</b> | <b>Nov</b> | <b>Dec</b> |
| <b>M200</b>  | 0.033      | 0.219      | 0.088      | 0.136      | 0.202      | 0.039      | -          | 0.009      | -          | -          | -          | -0.108     |
|              |            |            |            |            |            |            | 0.017      |            | 0.009      | 0.101      | 0.165      |            |
| <b>H200</b>  | -          | 0.189      | 0.202      | 0.345      | 0.164      | -          | -          | -          | -          | -          | -          | -0.257     |
|              | 0.089      |            |            |            |            | 0.073      | 0.126      | 0.059      | 0.128      | 0.230      | 0.318      |            |
| <b>M1200</b> | 0.003      | 0.189      | 0.095      | 0.146      | 0.213      | 0.064      | 0.008      | 0.022      | -          | -          | -          | -0.121     |
|              |            |            |            |            |            |            |            |            | 0.011      | 0.094      | 0.147      |            |
| <b>H1200</b> | -          | 0.173      | 0.227      | 0.372      | 0.204      | -          | -          | -          | -          | -          | -          | -0.254     |
|              | 0.111      |            |            |            |            | 0.021      | 0.111      | 0.065      | 0.119      | 0.189      | 0.261      |            |
| <b>Cudd*</b> | <b>Jan</b> | <b>Feb</b> | <b>Mar</b> | <b>Apr</b> | <b>May</b> | <b>Jun</b> | <b>Jul</b> | <b>Aug</b> | <b>Sep</b> | <b>Oct</b> | <b>Nov</b> | <b>Dec</b> |
| <b>M200</b>  | -          | -          | 0.005      | 0.011      | 0.007      | 0.003      | -          | -          | -          | -          | -          | -0.118     |
|              | 0.040      | 0.002      |            |            |            |            | 0.001      | 0.021      | 0.041      | 0.080      | 0.162      |            |
| <b>H200</b>  | -          | 0.079      | 0.089      | 0.086      | 0.054      | 0.062      | -          | -          | -          | -          | -          | -0.193     |
|              | 0.082      |            |            |            |            |            | 0.017      | 0.026      | 0.105      | 0.120      | 0.229      |            |
| <b>M1200</b> | -          | 0.004      | 0.035      | 0.05       | 0.047      | 0.005      | -          | -          | -          | -          | -          | -0.150     |
|              | 0.082      |            |            |            |            |            | 0.020      | 0.048      | 0.072      | 0.094      | 0.150      |            |
| <b>H1200</b> | -          | 0.050      | 0.053      | 0.102      | 0.090      | 0.044      | -          | -          | -          | -          | -          | -0.189     |
|              | 0.082      |            |            |            |            |            | 0.038      | 0.061      | 0.113      | 0.111      | 0.191      |            |
| <b>Okha</b>  | <b>Jan</b> | <b>Feb</b> | <b>Mar</b> | <b>Apr</b> | <b>May</b> | <b>Jun</b> | <b>Jul</b> | <b>Aug</b> | <b>Sep</b> | <b>Oct</b> | <b>Nov</b> | <b>Dec</b> |
| <b>M200</b>  | 0.056      | 0.049      | 0.047      | 0.069      | 0.138      | 0.132      | 0.017      | -          | -          | -          | -          | -0.056     |
|              |            |            |            |            |            |            |            | 0.045      | 0.048      | 0.077      | 0.101      |            |
| <b>H200</b>  | -          | 0.022      | 0.099      | 0.178      | 0.149      | 0.160      | 0.254      | 0.066      | 0.007      | -          | -          | -0.051     |
|              | 0.051      |            |            |            |            |            |            |            |            | 0.079      | 0.109      |            |

|               |            |            |            |            |            |            |            |            |            |            |            |            |
|---------------|------------|------------|------------|------------|------------|------------|------------|------------|------------|------------|------------|------------|
| <b>M1200</b>  | 0.081      | 0.129      | 0.095      | 0.056      | 0.115      | 0.086      | -          | -          | -          | -          | -          | -0.055     |
|               |            |            |            |            |            |            | 0.212      | 0.266      | 0.149      | 0.157      | 0.160      |            |
| <b>H1200</b>  | -          | 0.189      | 0.230      | 0.199      | 0.117      | 0.111      | 0.253      | -          | -          | -          | -          | -0.041     |
|               | 0.027      |            |            |            |            |            |            | 0.170      | 0.221      | 0.189      | 0.091      |            |
| <b>Mumbai</b> | <b>Jan</b> | <b>Feb</b> | <b>Mar</b> | <b>Apr</b> | <b>May</b> | <b>Jun</b> | <b>Jul</b> | <b>Aug</b> | <b>Sep</b> | <b>Oct</b> | <b>Nov</b> | <b>Dec</b> |
| <b>M200</b>   | -          | -          | 0.023      | 0.091      | 0.124      | 0.153      | 0.125      | 0.066      | 0.007      | -          | -          | -0.071     |
|               | 0.088      | 0.049      |            |            |            |            |            |            |            | 0.046      | 0.090      |            |
| <b>H200</b>   | -          | -          | 0.007      | 0.106      | 0.083      | 0.082      | 0.132      | 0.097      | 0.007      | -          | -          | -0.089     |
|               | 0.082      | 0.036      |            |            |            |            |            |            |            | 0.026      | 0.094      |            |
| <b>M1200</b>  | -          | -          | 0.044      | 0.046      | 0.088      | 0.170      | 0.097      | -          | -          | -          | -          | -0.045     |
|               | 0.052      | 0.011      |            |            |            |            |            | 0.010      | 0.052      | 0.052      | 0.068      |            |
| <b>H1200</b>  | -          | -          | -          | 0.050      | 0.029      | -          | 0.099      | -          | -          | -          | -          | -0.103     |
|               | 0.088      | 0.013      | 0.056      |            |            | 0.008      |            | 0.001      | 0.107      | 0.077      | 0.108      |            |
| <b>Goa</b>    | <b>Jan</b> | <b>Feb</b> | <b>Mar</b> | <b>Apr</b> | <b>May</b> | <b>Jun</b> | <b>Jul</b> | <b>Aug</b> | <b>Sep</b> | <b>Oct</b> | <b>Nov</b> | <b>Dec</b> |
| <b>M200</b>   | -          | -          | 0.047      | 0.028      | 0.045      | 0.085      | 0.085      | 0.053      | -          | -          | -          | -0.035     |
|               | 0.052      | 0.017      |            |            |            |            |            |            | 0.038      | 0.072      | 0.075      |            |
| <b>H200</b>   | -          | -          | 0.034      | 0.013      | 0.002      | 0.045      | 0.121      | 0.114      | 0.010      | -          | -          | -0.061     |
|               | 0.020      | 0.006      |            |            |            |            |            |            |            | 0.072      | 0.101      |            |
| <b>M1200</b>  | -          | -          | 0.085      | -          | -          | 0.040      | 0.039      | 0.017      | -          | -          | -          | -0.045     |
|               | 0.050      | 0.014      |            | 0.002      | 0.037      |            |            |            | 0.081      | 0.089      | 0.072      |            |
| <b>H1200</b>  | 0.028      | -          | 0.063      | -          | -          | 0.068      | 0.124      | 0.040      | -          | -          | -          | -0.025     |
|               |            | 0.027      |            | 0.023      | 0.059      |            |            |            | 0.022      | 0.055      | 0.031      |            |
| <b>Kollam</b> | <b>Jan</b> | <b>Feb</b> | <b>Mar</b> | <b>Apr</b> | <b>May</b> | <b>Jun</b> | <b>Jul</b> | <b>Aug</b> | <b>Sep</b> | <b>Oct</b> | <b>Nov</b> | <b>Dec</b> |
| <b>M200</b>   | 0.094      | 0.017      | 0.009      | 0.009      | -          | 0.023      | 0.013      | 0.027      | -          | -          | -          | 0.056      |
|               |            |            |            |            | 0.001      |            |            |            | 0.035      | 0.078      | 0.036      |            |
| <b>H200</b>   | 0.032      | 0.027      | 0.010      | 0.002      | -          | -          | 0.012      | 0.001      | -          | -          | -          | 0.060      |
|               |            |            |            |            | 0.015      | 0.013      |            |            | 0.021      | 0.041      | 0.007      |            |
| <b>M1200</b>  | 0.107      | 0.016      | -          | 0.008      | -          | 0.037      | 0.016      | 0.031      | -          | -          | -          | 0.051      |
|               |            |            | 0.021      |            | 0.024      |            |            |            | 0.048      | 0.061      | 0.011      |            |
| <b>H1200</b>  | 0.034      | 0.019      | -          | -          | -          | -          | 0.023      | -          | -          | -          | -          | 0.061      |
|               |            |            | 0.007      | 0.007      | 0.014      | 0.001      |            | 0.022      | 0.006      | 0.023      | 0.008      |            |
| <b>KK*</b>    | <b>Jan</b> | <b>Feb</b> | <b>Mar</b> | <b>Apr</b> | <b>May</b> | <b>Jun</b> | <b>Jul</b> | <b>Aug</b> | <b>Sep</b> | <b>Oct</b> | <b>Nov</b> | <b>Dec</b> |
| <b>M200</b>   | -          | -          | -          | -          | -          | -          | -          | -          | -          | -          | -          | -0.079     |
|               | 0.105      | 0.032      | 0.019      | 0.014      | 0.006      | 0.014      | 0.032      | 0.045      | 0.041      | 0.004      | 0.015      |            |
| <b>H200</b>   | -          | -          | -          | -          | -          | -          | -          | -          | -          | -          | -          | -0.115     |
|               | 0.075      | 0.035      | 0.036      | 0.015      | 0.001      | 0.006      | 0.026      | 0.035      | 0.013      | 0.034      | 0.035      |            |

|              |            |            |            |            |            |            |            |            |            |            |            |            |
|--------------|------------|------------|------------|------------|------------|------------|------------|------------|------------|------------|------------|------------|
| <b>M1200</b> | -          | -          | -          | -          | -          | -          | -          | -          | -          | -          | -          | -          |
|              | 0.105      | 0.018      | 0.011      | 0.037      | 0.054      | 0.076      | 0.080      | 0.068      | 0.053      | 0.003      | 0.006      | -0.079     |
| <b>H1200</b> | -          | -          | -          | -          | -          | -          | -          | -          | -          | -          | -          | -          |
|              | 0.091      | 0.026      | 0.023      | 0.021      | 0.008      | 0.062      | 0.032      | 0.004      | 0.002      | 0.029      | 0.021      | -0.115     |
| <b>ESRL*</b> | <b>Jan</b> | <b>Feb</b> | <b>Mar</b> | <b>Apr</b> | <b>May</b> | <b>Jun</b> | <b>Jul</b> | <b>Aug</b> | <b>Sep</b> | <b>Oct</b> | <b>Nov</b> | <b>Dec</b> |
| <b>M200</b>  | -          | -          | -          | -          | -          | -          | -          | -          | -          | -          | -          | -          |
|              | 0.039      | 0.011      | 0.013      | 0.000      | 0.019      | 0.038      | 0.044      | 0.037      | 0.040      | 0.022      | 0.098      | -0.101     |
| <b>H200</b>  | -          | -          | -          | -          | -          | -          | -          | -          | -          | -          | -          | -          |
|              | 0.064      | 0.019      | 0.005      | 0.013      | 0.034      | 0.144      | 0.068      | 0.004      | 0.057      | 0.023      | 0.125      | -0.098     |
| <b>M1200</b> | -          | -          | -          | -          | -          | -          | -          | -          | -          | -          | -          | -          |
|              | 0.016      | 0.047      | 0.046      | 0.005      | 0.008      | 0.067      | 0.062      | 0.036      | 0.066      | 0.020      | 0.094      | -0.080     |
| <b>H1200</b> | -          | -          | -          | -          | -          | -          | -          | -          | -          | -          | -          | -          |
|              | 0.060      | 0.040      | 0.032      | 0.014      | 0.075      | 0.206      | 0.092      | 0.011      | 0.078      | 0.038      | 0.118      | -0.080     |

**Table S3:** Quantification of freshwater advection due to WBC and EICC from Model and INC-HYC simulation

|                | <b>MAM (WBC)</b> | <b>JJAS (EICC)</b> | <b>ON (EICC)</b> | <b>DJF (NMC)</b> |
|----------------|------------------|--------------------|------------------|------------------|
| <b>Model</b>   | 2.096%           | 6.030%             | 4.857%           | 2.827%           |
| <b>INC-HYC</b> | 3.617%           | 8.390%             | 5.135%           | 2.628%           |
